# Supplementary material for: Controversial effect of two methylguanidine-based ionic liquids on firefly luciferase
Source: Royal Society of Chemistry journal article supplement (doi:10.1039/c2pp05389f), 2012-03-06

## Supplementary Information

### Controversial Effect of Two Methylguanidine Based Ionic Liquids on firefly Luciferase

Mehdi Ebrahimi<sup>1</sup>, Saman Hosseinkhani<sup>2\*</sup>, Akbar Heydari<sup>3</sup>, Ramazan Ali Khavari-Nejad<sup>1</sup>, Jafar Akbari<sup>3</sup>

<sup>1</sup> Department of Biology, Science and Research Branch, Islamic Azad University, Tehran, Iran

<sup>2</sup> Department of Biochemistry, Faculty of Biological Sciences, Tarbiat Modares University, Tehran, Iran

<sup>3</sup> Department of Chemistry, Faculty of Science, Tarbiat Modares University, Tehran, Iran

\*Address correspondence to:

Tel: (+98)-21-82884407; Fax: (+98)-21-82884457; E-mail: ([saman\\_h@modares.ac.ir](mailto:saman_h@modares.ac.ir))

**Fig. S1. Spectral data for Tetramethylguanidinium lactate [TMG][Lac]**

- A)  $^1\text{H}$  NMR ( $\text{CDCl}_3$ , 500 MHz):  $\delta = 1.27$  (d, 3 H), 2.92 (s, 12 H), 3.94 (q, 1 H), 4.9-6.7 (brs, 3 H,  $\text{NH}_2$ , OH)
- B)  $^{13}\text{C}$  NMR ( $\text{CDCl}_3$ , 125 MHz):  $\delta = 20.31, 39.58, 68.09, 162.70, 180.43$ .

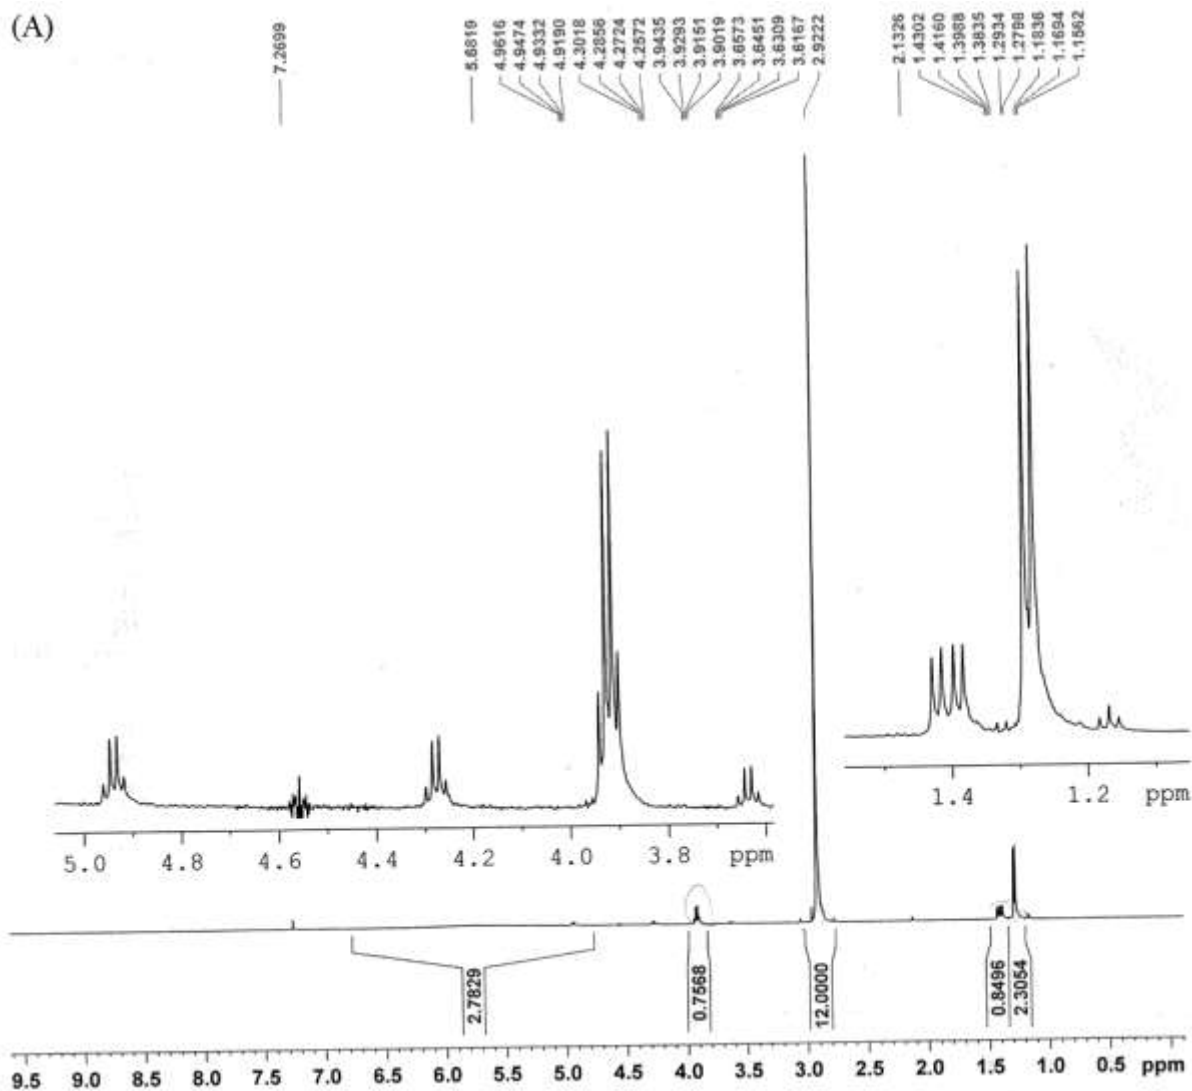

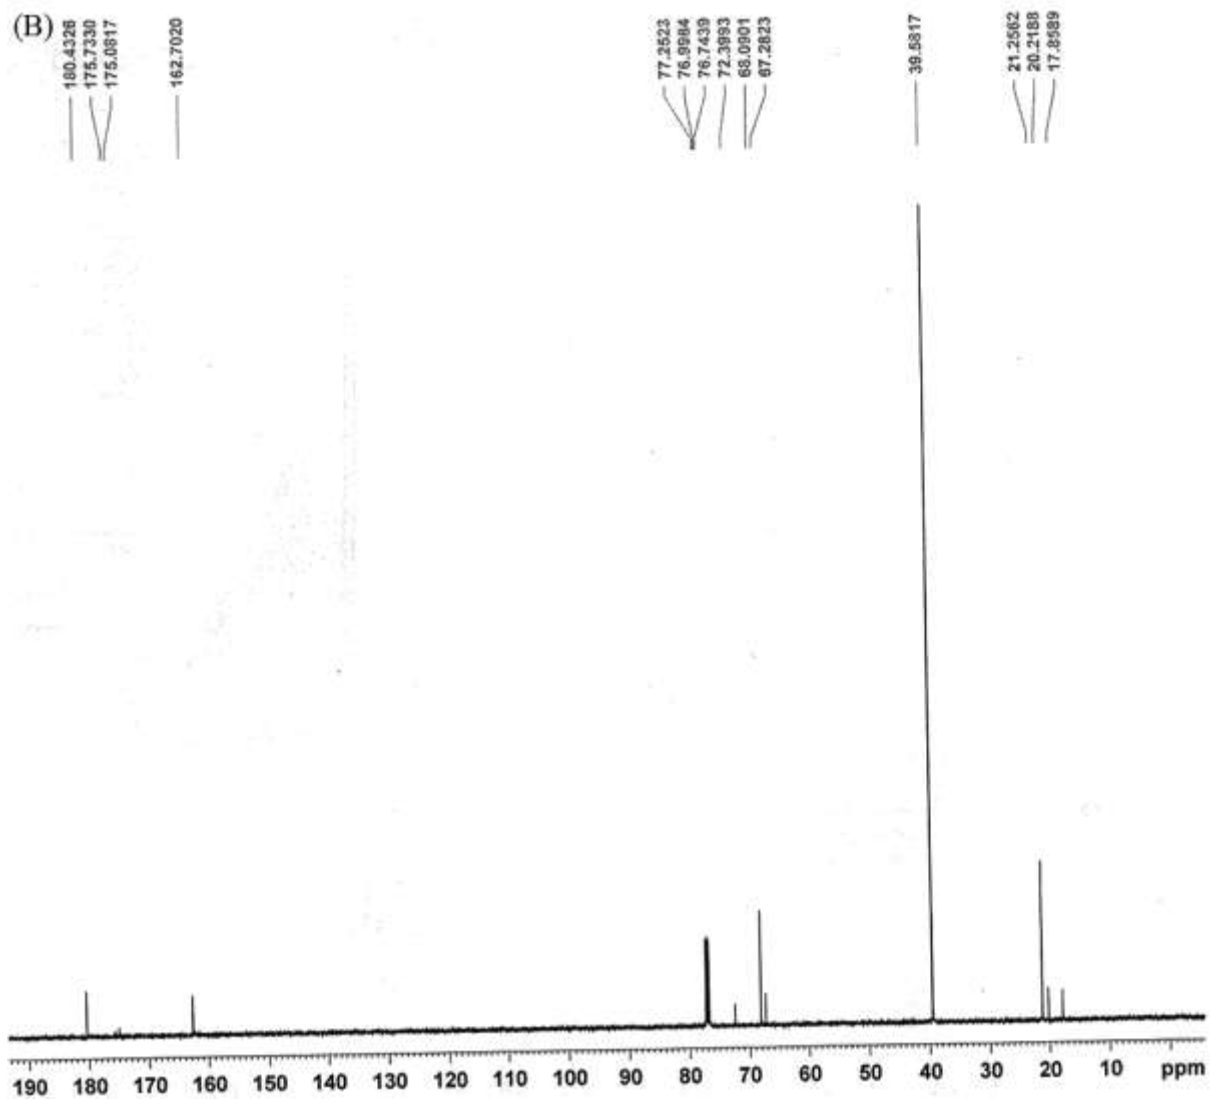

**Fig. S2. Spectral data for tetramethylguanidinium propionate [TMG][Prop]**

- A)  $^1\text{H}$  NMR ( $\text{CDCl}_3$ , 500 MHz):  $\delta = 1.03$  (t, 3 H), 2.19 (q, 2 H), 2.99 (s, 12 H), 7.30- 10 (brs, 2 H,  $\text{NH}_2$ )  
B)  $^{13}\text{C}$  NMR ( $\text{CDCl}_3$ , 125MHz):  $\delta = 10.18, 29.68, 40.12, 161.75, 180$ .

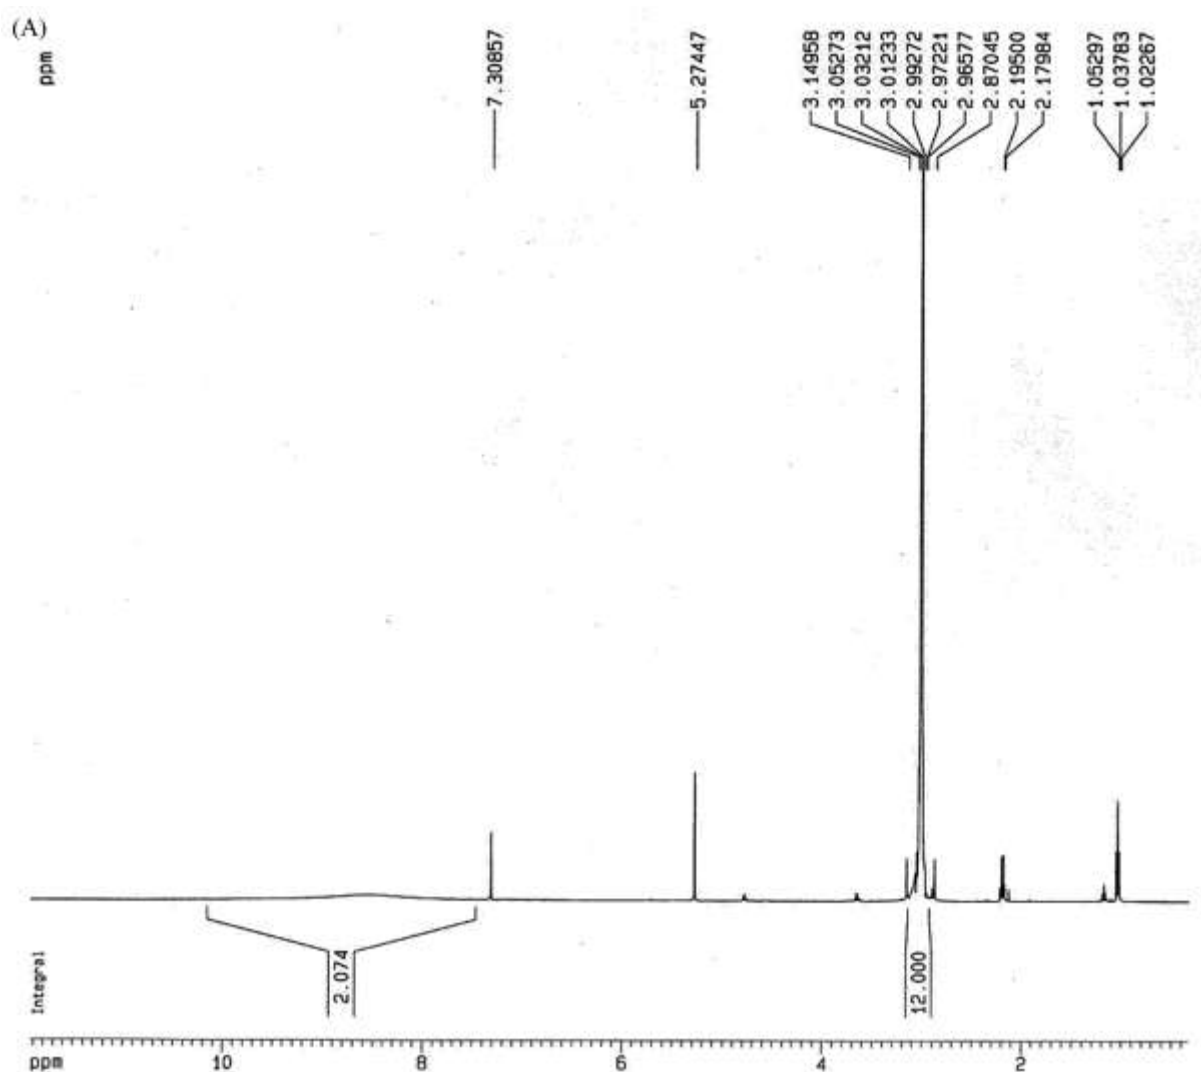

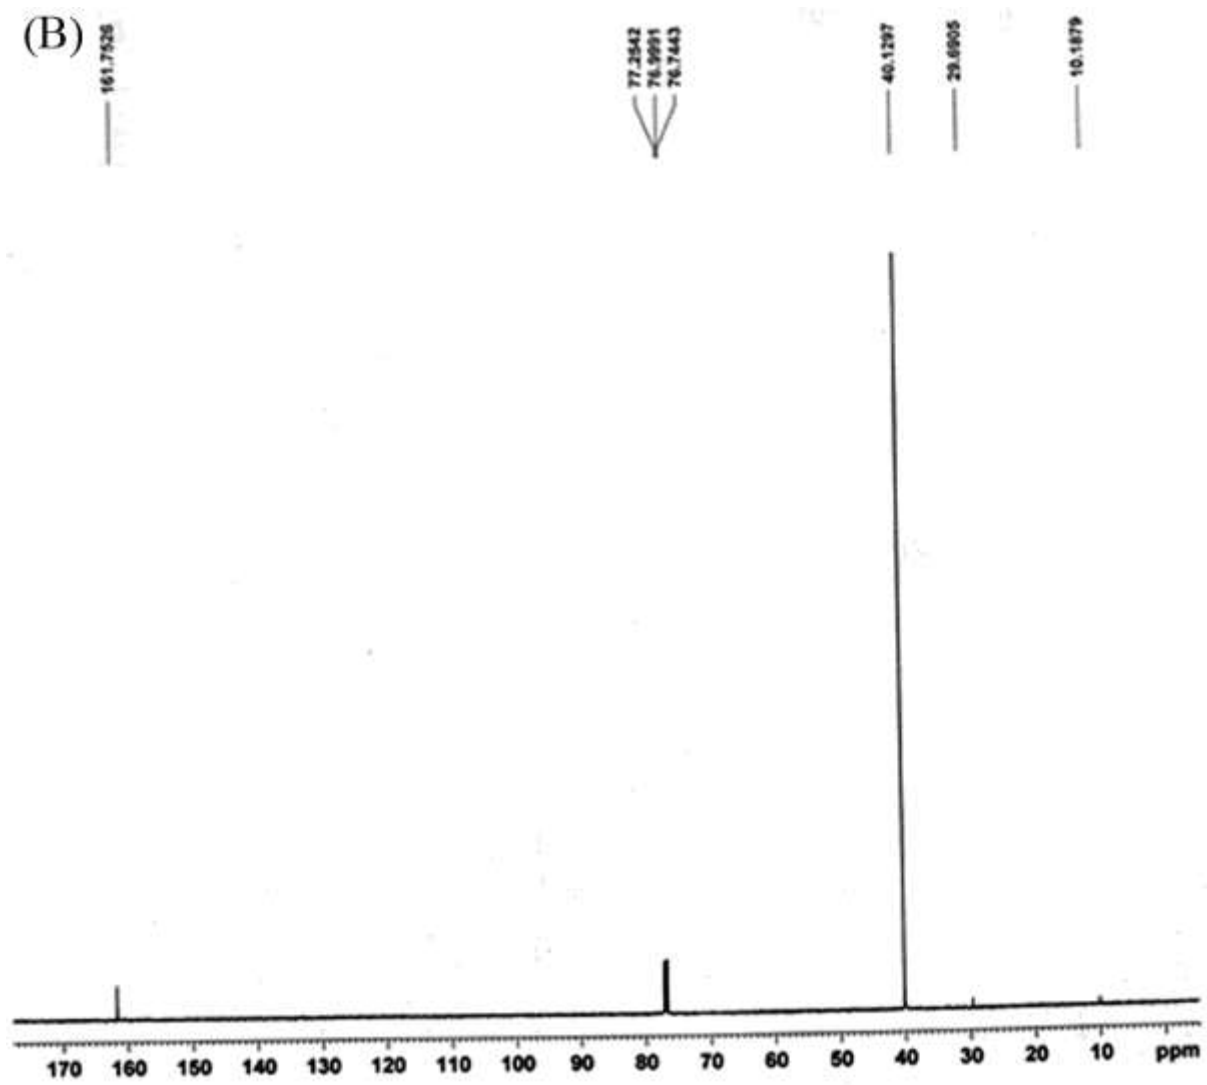

Supplement: c2pp05389f.pdf [file c2pp05389f.pdf]
